# Supplementary material for: Genomic and Genic Deletions of the FOX Gene Cluster on 16q24.1 and Inactivating Mutations of FOXF1 Cause Alveolar Capillary Dysplasia and Other Malformations
Source: PubMed Central journal article supplement (PMC2694971; doi:10.1016/j.ajhg.2009.05.005), 2009-06-12
Supplement: mmc1.pdf [file mmc1.pdf]

Supplemental Data

**Genomic and Genic Deletions of the FOX Gene Cluster  
on 16q24.1 and Inactivating Mutations of FOXF1 Cause  
Alveolar Capillary Dysplasia and Other Malformations**

Paweł Stankiewicz Partha Sen, Samarth S. Bhatt, Mekayla Storer, Zhilian Xia, Bassem A. Bejjani, Zhishuo Ou, Joanna Wiszniewska, Daniel J. Driscoll, Juan Bolivar, Mislen Bauer, Elaine H. Zackai, Donna McDonald-McGinn, Małgorzata M.J. Nowaczyk, Mitzi Murray, Tamim H. Shaikh, Vicki Martin, Matthew Tyreman Ingrid Simonic, Lionel Willatt, Joan Paterson, Sarju Mehta, Diana Rajan, Tomas Fitzgerald, Susan Gribble, Elena Prigmore, Ankita Patel, Lisa G. Shaffer, Nigel P. Carter, Sau Wai Cheung, Claire Langston, and Charles Shaw-Smith

**Table S1. Summary of the Results of Microsatellite Polymorphism, SNP, and Mutation Cloning Analyses**

|                                                  | Case D1         |    |         | Case D3         |          |          | Case D4         |    |     | Case D8         |    |     | Case D9         |      |            | Case D10        |    |     | Case M4         |                      |     |
|--------------------------------------------------|-----------------|----|---------|-----------------|----------|----------|-----------------|----|-----|-----------------|----|-----|-----------------|------|------------|-----------------|----|-----|-----------------|----------------------|-----|
| SNP                                              | F               | C  | M       | F               | C        | M        | F               | C  | M   | F               | C  | M   | F               | C    | M          | F               | C  | M   | F               | C                    | M   |
| rs12596341                                       | C/C             | C  | A/A     | ND              | ND       | ND       | ND              | ND | ND  | ND              | ND | ND  | ND              | ND   | ND         | ND              | ND | ND  | ND              | ND                   | ND  |
| rs10660430                                       | -/ATG           | -  | ATG/ATG | ND              | ND       | ND       | ND              | ND | ND  | ND              | ND | ND  | ND              | ND   | ND         | ND              | ND | ND  | ND              | ND                   | ND  |
| rs11398689                                       | -/G             | -  | G/G     | ND              | ND       | ND       | ND              | ND | ND  | ND              | ND | ND  | ND              | ND   | ND         | ND              | ND | ND  | ND              | ND                   | ND  |
| rs9941308                                        | ND              | ND | ND      | ND              | ND       | ND       | ND              | ND | ND  | ND              | ND | ND  | NI              | NI   | NI         | C/C             | C  | G/G | ND              | ND                   | ND  |
| rs58016760                                       | ND              | ND | ND      | ND              | ND       | ND       | ND              | ND | ND  | ND              | ND | ND  | ----/----       | ---- | GTGT/ GTGT | NI              | NI | NI  | ND              | ND                   | ND  |
| rs1364225                                        | NI              | NI | NI      | NI              | NI       | NI       | C/C             | C  | G/G | C/C             | C  | G/G | ND              | ND   | ND         | ND              | ND | ND  | ND              | ND                   | ND  |
| rs1424019                                        | NI              | NI | NI      | NI              | NI       | NI       | A/A             | A  | G/G | A/A             | A  | G/G | ND              | ND   | ND         | ND              | ND | ND  | ND              | ND                   | ND  |
| rs1364224                                        | NI              | NI | NI      | NI              | NI       | NI       | NI              | NI | NI  | A/A             | A  | G/G | ND              | ND   | ND         | ND              | ND | ND  | ND              | ND                   | ND  |
| rs1424016                                        | NI              | NI | NI      | NI              | NI       | NI       | NI              | NI | NI  | A/A             | A  | C/C | ND              | ND   | ND         | ND              | ND | ND  | ND              | ND                   | ND  |
| rs58557724                                       | NI              | NI | NI      | NI              | NI       | NI       | T/T             | T  | C/C | T/T             | T  | C/C | ND              | ND   | ND         | ND              | ND | ND  | ND              | ND                   | ND  |
| rs1064259                                        | NI              | NI | NI      | NI              | NI       | NI       | A/A             | A  | G/G | NI              | NI | NI  | ND              | ND   | ND         | ND              | ND | ND  | ND              | ND                   | ND  |
| rs2078304                                        | ND              | ND | ND      | ND              | ND       | ND       | ND              | ND | ND  | ND              | ND | ND  | ND              | ND   | ND         | ND              | ND | ND  | C/C             | C/G                  | G/G |
| Association of mutation c.1063T>C with rs2078304 | ND              | ND | ND      | ND              | ND       | ND       | ND              | ND | ND  | ND              | ND | ND  | ND              | ND   | ND         | ND              | ND | ND  | T/T             | C with C<br>T with G | T/T |
| <b>Microsatellite marker</b>                     |                 |    |         | <b>F</b>        | <b>C</b> | <b>M</b> |                 |    |     |                 |    |     |                 |      |            |                 |    |     |                 |                      |     |
| Chr:84,723,490<br>-84,723,542                    |                 |    |         | 1,1             | 1        | 2,3      |                 |    |     |                 |    |     |                 |      |            |                 |    |     |                 |                      |     |
| <b>Origin</b>                                    | <b>Maternal</b> |    |         | <b>Maternal</b> |          |          | <b>Maternal</b> |    |     | <b>Maternal</b> |    |     | <b>Maternal</b> |      |            | <b>Maternal</b> |    |     | <b>Paternal</b> |                      |     |

ND, not determined; NI, not informative; F, Father; M, Mother; C, Child

**Table S2. Associated Anomalies in ACD/MPV Patients without a Mutation in *FOXF1***

| <b>Case</b> | <b>Associated Anomalies</b>                                                                                                                                                                                     |
|-------------|-----------------------------------------------------------------------------------------------------------------------------------------------------------------------------------------------------------------|
| 1.4         | Congenital heart disease, severe coarctation of aorta, ventricular septal defect, mitral valve and tricuspid valve malformation, malformed atrial septum, patent ductus arteriosus, left ventricular hypoplasia |
| 3.4         | GI malrotation, pneumothorax                                                                                                                                                                                    |
| 5.3         | Bilateral periventricular leukomalacia, hydronephrosis of left kidney                                                                                                                                           |
| 7.3         | Right lung with two lobes, bilateral pyelocaliceal dilatation with thinned renal cortices                                                                                                                       |
| 10.3        | Voluminous heavy lungs, both right and left lungs are bilobed                                                                                                                                                   |
| 13.5        | Hepatosplenomegaly                                                                                                                                                                                              |
| 15.3        | Butterfly vertebra, imperforate anus with mildly distended large bowel, two lobes on right and one on left lung, pulmonary, renal, adrenal, and splenic congestion                                              |
| 20.8        | Cardiomegaly, right ventricular hypertrophy, autopsy limited to heart and lungs                                                                                                                                 |
| 21.6        | Patient D8                                                                                                                                                                                                      |
| 28.7        | Patient D10                                                                                                                                                                                                     |
| 30.4        | Post mortem lung biopsy, no autopsy, very small placenta                                                                                                                                                        |
| 38.3        | Autopsy limited to lungs, fusion of right upper and middle lobes and left upper and lower lobes, bilateral pneumothoraces, acute bronchopneumonia of lower left lobe                                            |
| 43.4        | Membranous pyloric atresia and bowel malrotation, small bowel adhesions, absence of gallbladder and quadrate lobe of liver, hepatosplenomegaly                                                                  |
| 47.4        | Patient D9                                                                                                                                                                                                      |
